# Supplementary material for: Zero Echo Time 17O-MRI Reveals Decreased Cerebral Metabolic Rate of Oxygen Consumption in a Murine Model of Amyloidosis
Source: MDPI journal article supplement (doi:10.3390/metabo11050263), 2021-04-22
Supplement: s1 [file s1]

## Supplementary Materials

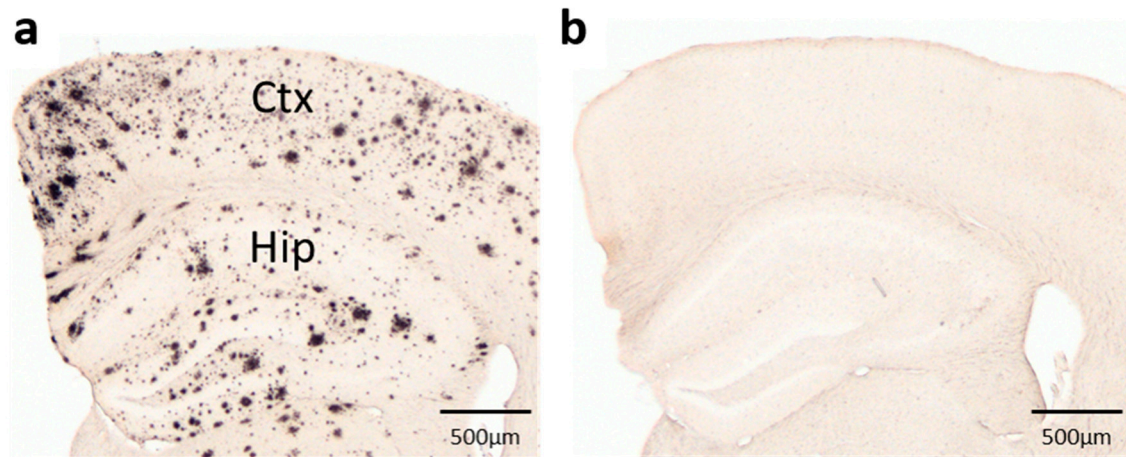

**Figure S1.** Detection of amyloid- $\beta$  by 4G8 immunostaining in the brain of 14 month-old  $APP_{swe}/PS1_{\Delta E9}$  (a) mice and not in CTR (b). Ctx: cortex, Hip: hippocampus.
